# Supplementary material for: COVID-19 genetic risk variants are associated with expression of multiple genes in diverse immune cell types
Source: PubMed Central journal article supplement — bioRxiv. 2020 Dec 2:2020.12.01.407429. Preprint. [Version 1] doi: 10.1101/2020.12.01.407429 (PMC7724655; doi:10.1101/2020.12.01.407429), 2020-12-02
Supplement: NIHPP2020.12.01.407429-supplement-1.pdf [file NIHPP2020.12.01.407429-supplement-1.pdf]

## SUPPLEMENTARY TABLES

**Table S1.** List of eGenes in each immune cell type and activation condition, along with information on its peak GWAS *cis*-eQTL (GWAS association  $P$  value  $< 5 \times 10^{-8}$ ) that is associated with COVID-19 illness.

**Table S2.** List of eGenes in each immune cell type and activation condition, along with information on all GWAS *cis*-eQTLs (GWAS association  $P$  value  $< 5 \times 10^{-8}$ ) that are associated with COVID-19 illness.

**Table S3.** List of eGenes in each immune cell type and activation condition, along with information on all GWAS *cis*-eQTLs (GWAS association  $P$  value  $< 1 \times 10^{-5}$ ) that are associated with COVID-19 illness.
